# Supplementary material for: Task-oriented evaluation of electronic medical records systems: development and validation of a questionnaire for physicians
Source: Springer Nature journal article supplement (doi:10.1186/1472-6947-4-1), 2004-02-09
Supplement: Additional file 17 [file 1472-6947-4-1-s17.doc]

# Appendix D: Details of the development of the questionnaire

## Development of the ‘Frequency of EMR use’ section

In the section covering frequency of use , we chose a relative scale in preference to an absolute frequency scale [31], i.e. pertaining to when the task is performed, table 1, instead of pertaining to days or weeks. This was done to accommodate for the considerable variation in how often each task is performed by the physicians in different clinical contexts.

The questions in this section were revised in three steps (Table 1) In the first revision, “never” and “always” was added to the first and last response alternative to make the scale complete. Furthermore, the original response choice label “Almost half of the time” was changed to “About half of the time” to make its meaning more symmetrical, and hence more suitable for its middle position. In the second revision of the questionnaire, “time” was replaced by “occasions” to make the questions easier to answer for the physician. Instead of having to estimate the product of the mean duration and the frequency of each task [29] to answer these questions, the physician would estimate just the frequency. The modifications to this scale made a separate validation of the response labels necessary, described in validation study 4. Additionally, in the second revision, the task-related questions regarding use of other software were removed, to reduce the questionnaire length. In the third revision, used in the test-retest study and in the interviews, two escape response choices were added (“task not supported” and “task does not apply to me”).

| Revisions | Questions and response labels in section covering frequency of EMR use | | | | | | | | | | |
| --- | --- | --- | --- | --- | --- | --- | --- | --- | --- | --- | --- |
| Original, Doll & Torkzadeh [13] | (12 questions about user satisfaction) | | | | | | | | | | |
| Almost never | | Seldom | | Almost half of the time | | | Most of the time | | Almost always | |
|  |  | |  | |  | | |  | |  | |
|  |  | |  | |  | | |  | |  | |
| Rev.1, National survey [8] | How often do you use a personal computer (PC) to assist you with the following tasks:  <list of 23 tasks> | | | | | | | | | | |
|  | Never/ Almost never | | Seldom | | About half of  the time | | | Most of the time | | Always/ Almost always | |
|  | What computer program do you use for this task? | | | | | | | | | | |
|  | EMR | | Other | |  | | |  | |  | |
|  |  | |  | |  | | |  | |  | |
|  |  | |  | |  | | |  | |  | |
| Rev. 2, Local survey [12] | How often do you use the EMR system to assist you with the following tasks:  <list of 19 tasks> | | | | | | | | | | |
|  | Never/ Almost never | | Seldom | | About half of the occasions | | | Most of the occasions | | Always/ Almost always | |
|  |  | |  | |  | | |  | |  | |
|  |  | |  | |  | | |  | |  | |
| Rev. 3, Test-retest study and interviews | How often do you use the EMR system to assist you with the following tasks:  <list of 24 tasks> | | | | | | | | | | |
|  | Never/ Almost never | Seldom | | About half of the occasions | | Most of the occasions | Always/ Almost always | | This task is not supported by our EMR | | This task does not apply to me |
|  |  | |  | |  | | |  | |  | |

Table 1 Development of questions regarding frequency of EMR use and task performance.

## Development of the ‘Task performance’ section

The questions regarding task performance were revised in two steps (Table 1, section B), starting from the second revision of the questionnaire. Here, the original response labels were replaced with more readable versions, as only the “ease of performance” question was used instead of both the original “ease of performance” and the “quality of work” questions. Each task-oriented question about task performance was modified to fit the “more difficult - easier” form of the response labels. In the third revision of the questionnaire, “compared to previous routines” was added to the main question. Further, one response choice was added (“don’t know/not applicable”) to the scale, to provide a response choice suitable for respondents who believed no functionality regarding this task was available.

| Revision | Questions and response labels in section covering task performance | | | | | | | | | | | | | | | | | |
| --- | --- | --- | --- | --- | --- | --- | --- | --- | --- | --- | --- | --- | --- | --- | --- | --- | --- | --- |
| Original, Aydin & Rice [14] | Overall, to what extent has the system changed these two aspects of your own department?   - Ease of performing our department’s work. - Quality of our department’s work | | | | | | | | | | | | | | | | | |
|  | 1 Significantly decreased | | 2 Decreased | | | 3 Slightly decreased | | | 4  No change | | | 5 Slightly increased | | 6 Increased | | | 7 Significantly increased | |
|  |  | | |  | | | |  | | |  | | | | |  | | |
| Rev. 2, Local survey [12] | In your opinion, how has <the EMR system> changed the performance of the following tasks in your department:  1. To <task 1> become...  2. To <task 2> has become...  <similar for rest of task list> | | | | | | | | | | | | | | | | | |
|  | Significantly more difficult | | More difficult | | | Slightly more difficult | | | No change | | | Slightly easier | | Easier | | | Significantly easier | |
|  |  | | |  | | | |  | | |  | | | | |  | | |
| Rev. 3 Test-retest study and interviews | In your opinion, how has the EMR changed the performance of the following work tasks, compared to previous routines? (Check ”Don’t know/not applicable if you’ve never used anything else than the current EMR for this task, or if the EMR in your own department doesn’t support this task.)  1. To <task 1> has become...  2. To <task 2> has become...  <similar for rest of task list> | | | | | | | | | | | | | | | | | |
|  | Significantly more difficult | More difficult | | | Slightly more difficult | | No change | | | Slightly easier | | | Easier | | Significantly easier | | | Don’t know/ not applicable |
|  |  | | |  | | | |  | | |  | | | | |  | | |

Table 2 Revisions of the section covering task performance when using the EMR system
